# Supplementary material for: Thyroid Nodules in Centenarians: Prevalence and Relationship to Lifestyle Characteristics and Dietary Habits
Source: Preprints.org preprint supplement (doi:10.20944/preprints201801.0138.v1), 2018-01-16
Supplement: Supplementary file 1 [file supplementary]

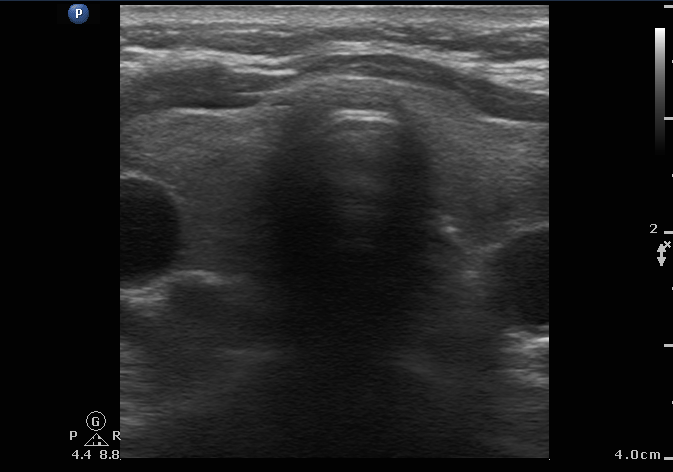

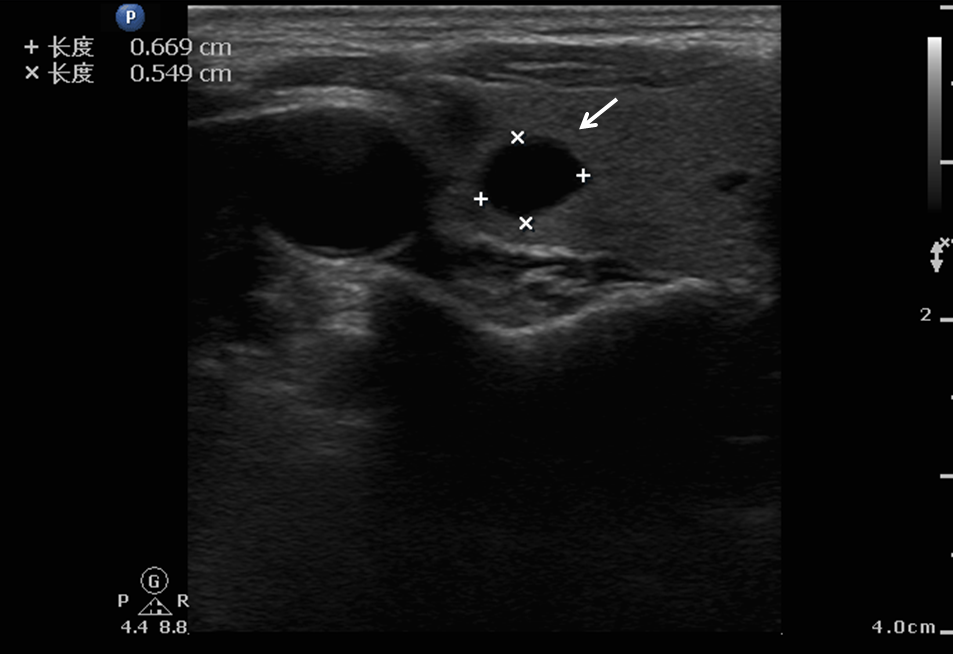


(a) (b)


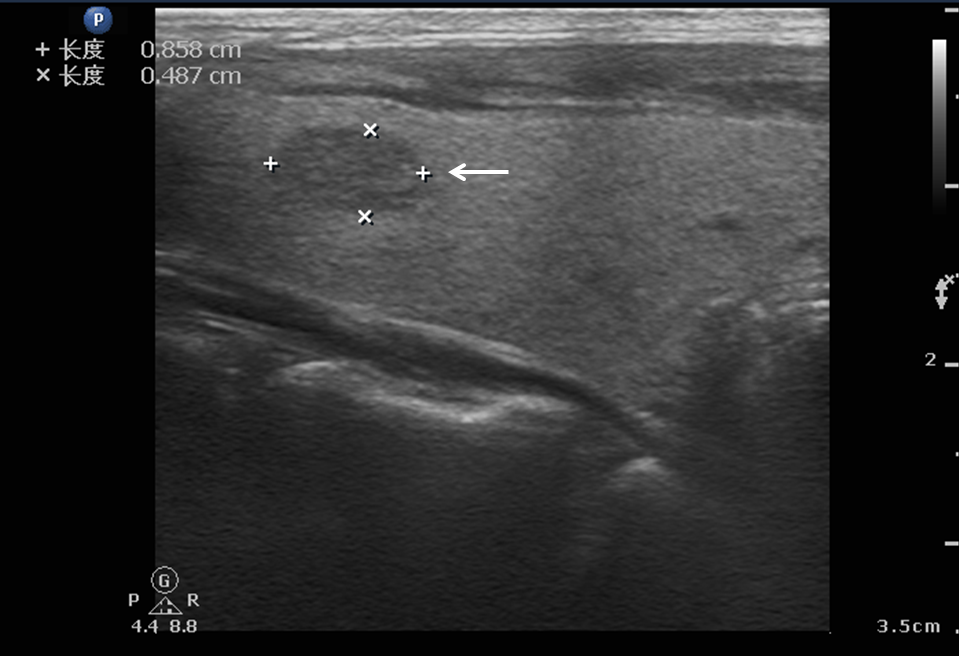

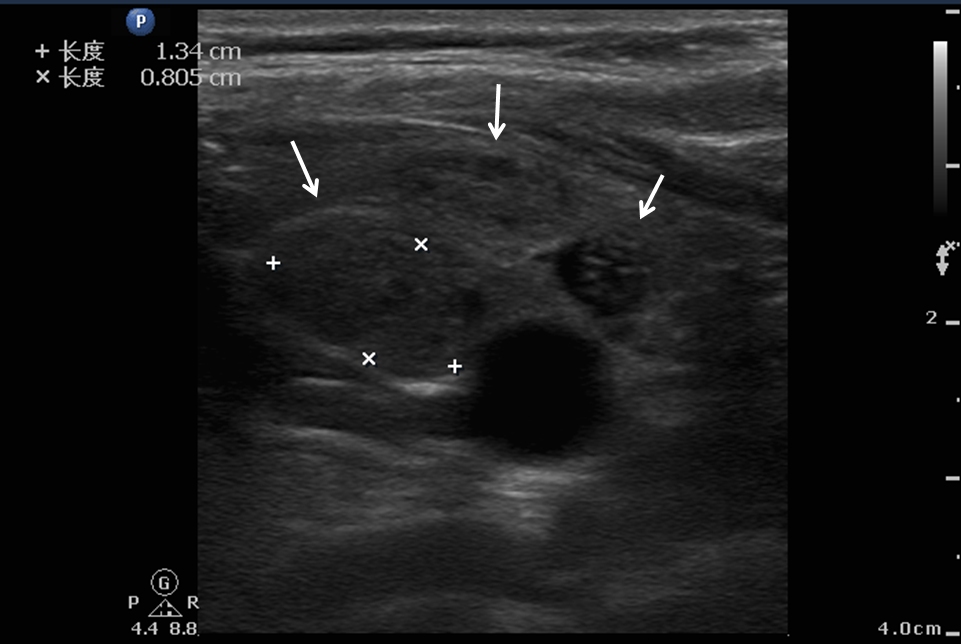


(c) (d)

Figure S1. Ultrasound images of thyroid glands with or without nodule in centenarians. (a) Normal thyroid gland without TNs, female, 104 years old; (b) A solitary cystic thyroid nodule in the right lobe of thyroid gland, female, 101 years old; (c) A solitary solid nodule in the in the right lobe of thyroid gland, female, 103 years old; (d) Multiple nodules including solid, and mixed mass in the left lobe of thyroid gland, female, 101 years old;
